# Supplementary material for: A Cross-Sectional Quantitative Metabolomics Study Evidencing the Metabolic Signature in Six Organs during a 14-Week High-Fat High-Sucrose and Standard Diet in Mice
Source: MDPI journal article supplement (doi:10.3390/nu16060803), 2024-03-12
Supplement: s1 [file s1]

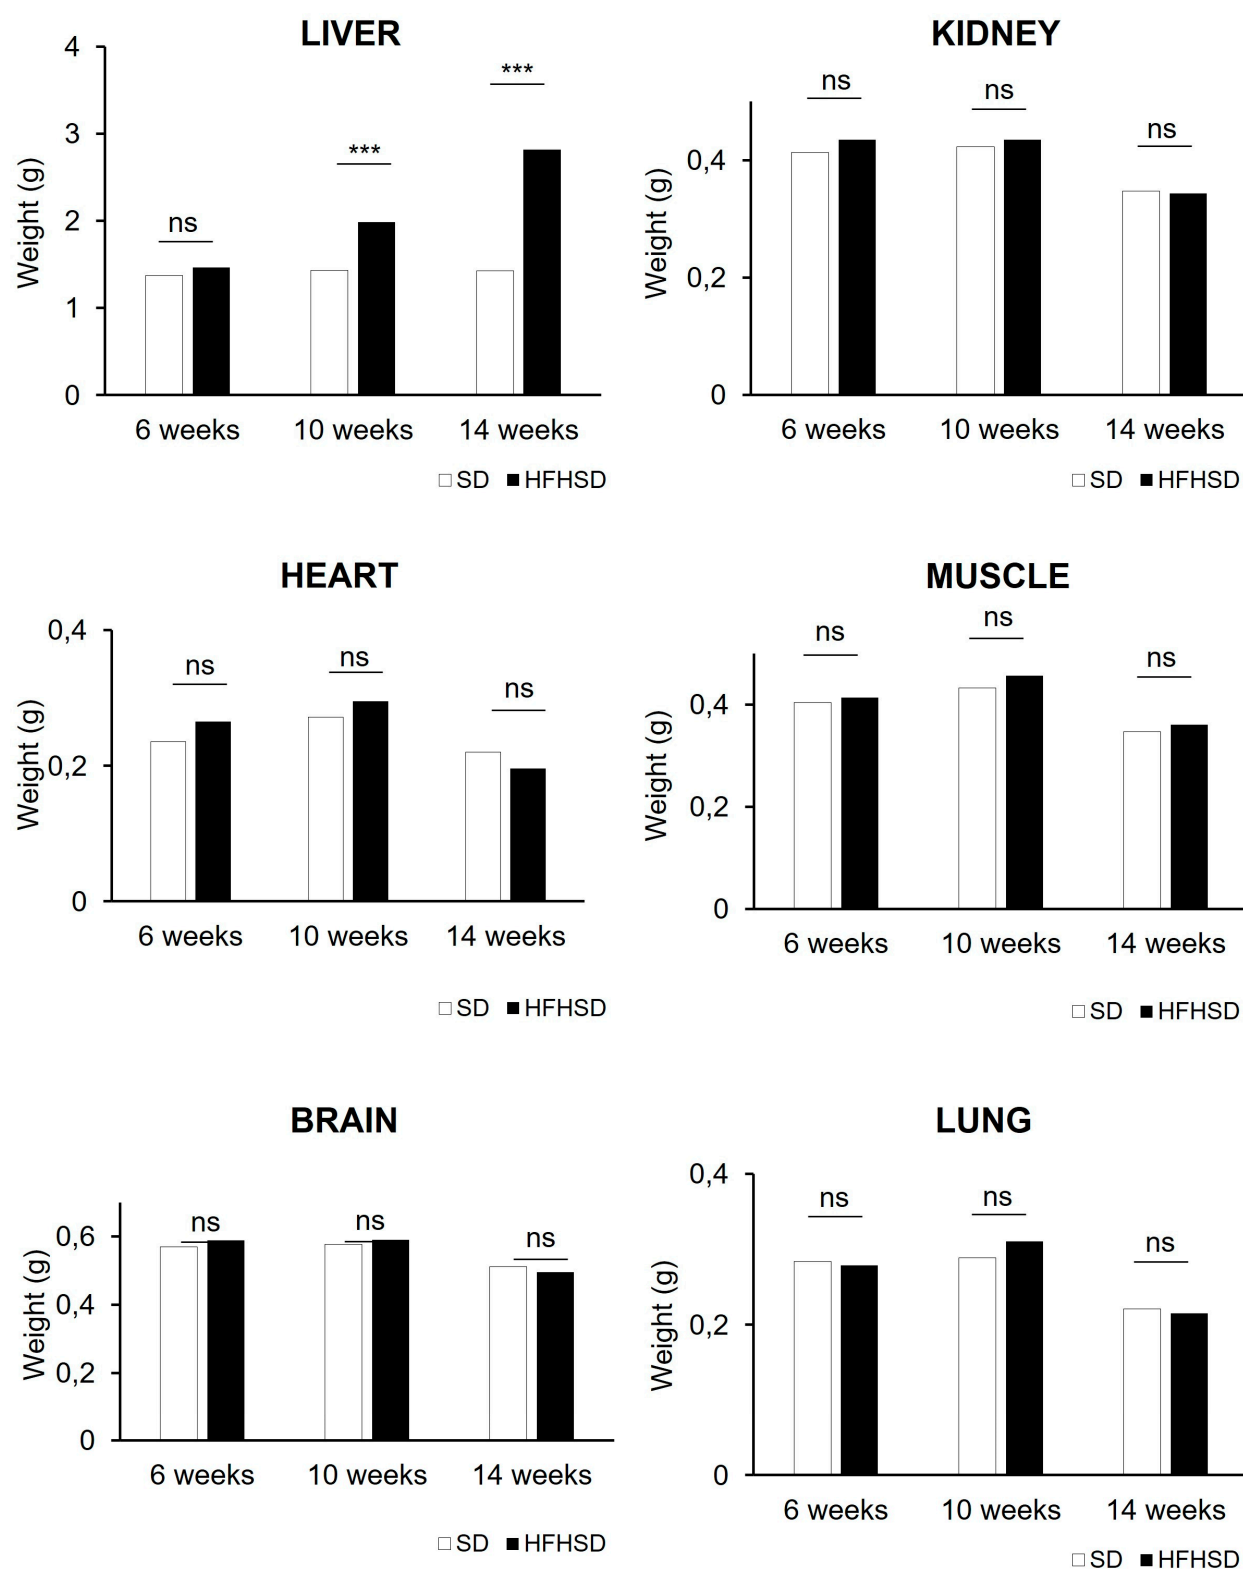

**Supplementary Figure 1.** Organ weight gains, mean  $\pm$  SD from  $n = 12$  mice per group. Ns: non significant, \*\*\*:  $p < 0.001$ .

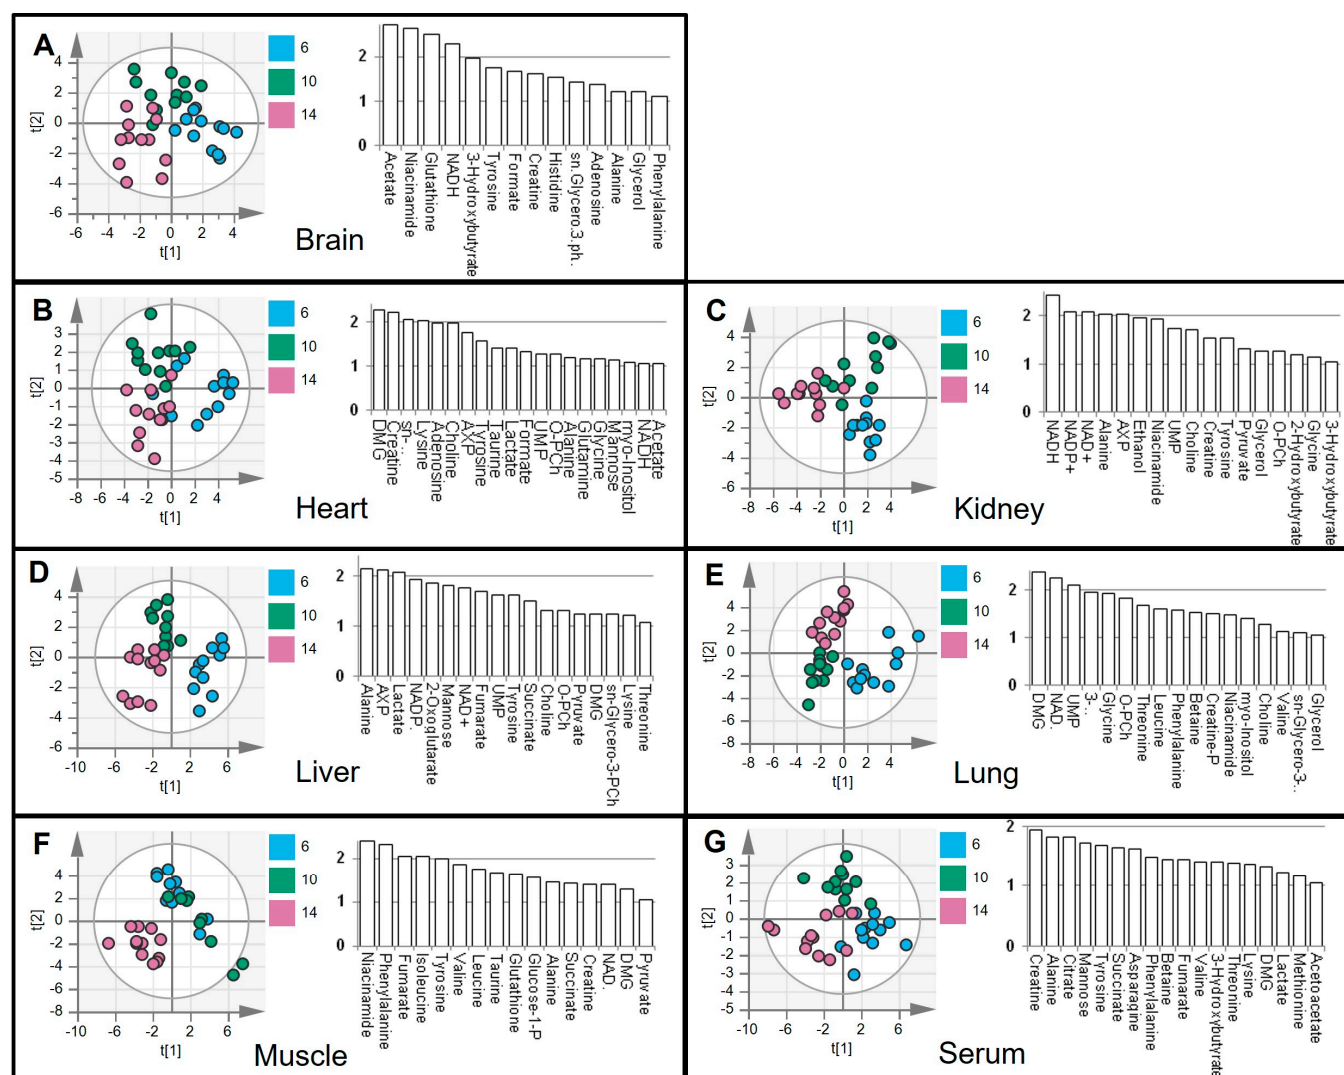

**Supplementary Figure 2.** NMR-based metabolomics analyses of SD-mice allow to evidence the impact of juvenile to adult transition on individual organs and serum. The supervised PLS-DA models based on 43 metabolite concentrations derived from 1H NMR profiles show the discrimination of the different time groups (6, 10 and 14 weeks on 5 weeks old mice). The score plots for each organ are presented. They present sample projections onto the predictive axis and the first orthogonal component of the model. The variable importance values in the projection (VIP) for each model are also presented. (A) Brain: score plot of the PLS-DA model (n=35, 2 components,  $R^2(X) = 0.243$ ,  $R^2(Y) = 0.628$ , and  $Q^2 = 0.406$ ; CV-ANOVA  $p = 2.3 \times 10^3$ ). (B) Heart: score plot of the PLS-DA model (n=35, 2 components,  $R^2(X) = 0.278$ ,  $R^2(Y) = 0.593$ , and  $Q^2 = 0.305$ ; CV-ANOVA  $p = 1.3 \times 10^3$ ). (C) Kidney: score plot of the PLS-DA model (n=34, 2 components,  $R^2(X) = 0.300$ ,  $R^2(Y) = 0.717$ , and  $Q^2 = 0.510$ ; CV-ANOVA  $p = 9.4 \times 10^6$ ). (D) Liver: score plot of the PLS-DA model (n= 34, 3 components,  $R^2(X) = 0.432$ ,  $R^2(Y) = 0.814$  and  $Q^2 = 0.605$ ; CV-ANOVA  $p = 4.2 \times 10^6$ ). (E) Lung: score plot of the (2 + 1) PLS-DA model (n=35, 3 components,  $R^2(X) = 0.458$ ,  $R^2(Y) = 0.838$ , and  $Q^2 = 0.662$ ; CV-ANOVA  $p = 1.7 \times 10^2$ ). (F) Muscle: score plot of the (2 + 2) PLS-DA model (n=33, 4 components,  $R^2(X) = 0.664$ ,  $R^2(Y) = 0.880$ , and  $Q^2 = 0.732$ ; CV-ANOVA  $p = 5.0 \times 10^7$ ). (G) Serum: score plot of the (2 + 1) PLS-DA model (n=35, 3 components,  $R^2(X) = 0.574$ ,  $R^2(Y) = 0.751$ , and  $Q^2 = 0.588$ ; CV-ANOVA  $p = 1.1 \times 10^6$ ).

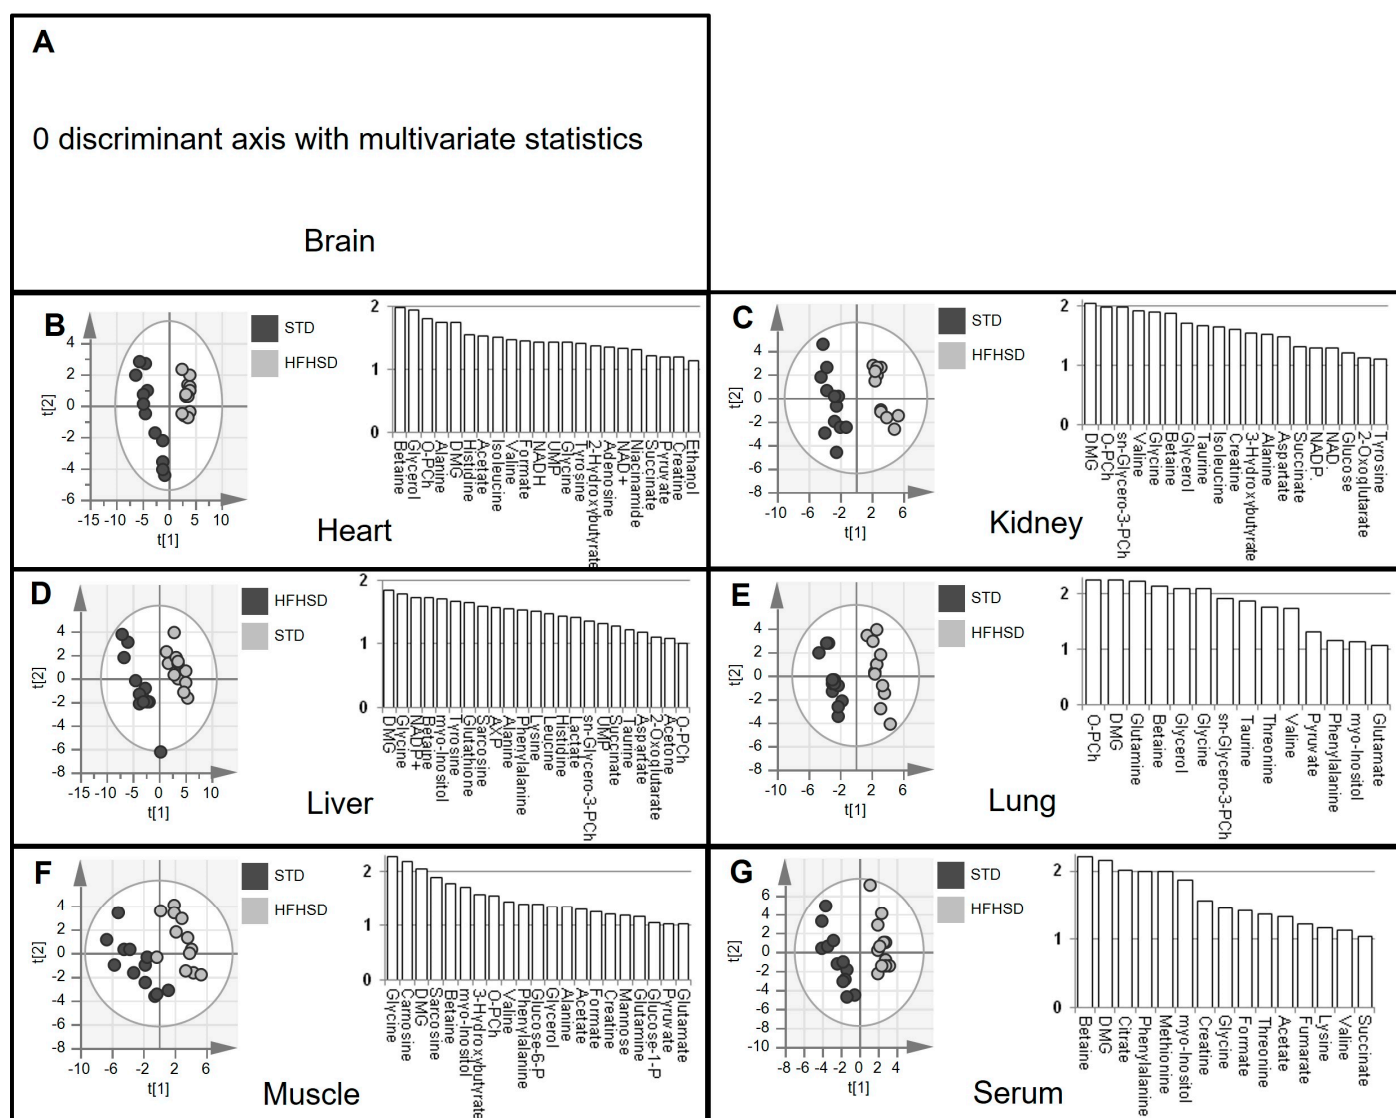

**Supplementary Figure 3.** The supervised PLS-DA models based on 43 metabolite concentrations allow to evidence the impact of the diet at 14 weeks (HFHSD vs SD, in grey and black respectively) on individual organs and serum. The PLS-DA score plots are presented for each organ. They present sample projections onto the predictive axis and the first component of the model. The variable importance values in the projection (VIP) for each model are also presented. (A) Brain: No significant discrimination model could be obtained. (B) Heart: score plot of the PLS-DA model ( $n=24$ , 3 components,  $R^2(X) = 0.619$ ,  $R^2(Y) = 0.977$ , and  $Q^2 = 0.923$ ; CV-ANOVA  $p = 9.1 \times 108$ ). (C) Kidney: score plot of the PLS-DA model ( $n=23$ , 2 components,  $R^2(X) = 0.445$ ,  $R^2(Y) = 0.959$ , and  $Q^2 = 0.904$ ; CV-ANOVA  $p = 9.8 \times 109$ ). (D) Liver: score plot of the PLS-DA model ( $n= 24$ , 2 components,  $R^2(X) = 0.965$ ,  $R^2(Y) = 0.924$  and  $Q^2 = 0.605$ ; CV-ANOVA  $p = 2.9 \times 1010$ ). (E) Lung: score plot of the PLS-DA model ( $n=24$ , 3 components,  $R^2(X) = 0.471$ ,  $R^2(Y) = 0.989$ , and  $Q^2 = 0.941$ ; CV-ANOVA  $p = 8.9 \times 109$ ). (F) Muscle: score plot of the model ( $n=24$ , 2 components,  $R^2(X) = 0.500$ ,  $R^2(Y) = 0.854$ , and  $Q^2 = 0.781$ ; CV-ANOVA  $p = 1.1 \times 105$ ). (G) Serum: score plot of the PLS-DA model ( $n=24$ , 2 components,  $R^2(X) = 0.504$ ,  $R^2(Y) = 0.953$  and  $Q^2 = 0.907$ ; CV-ANOVA  $p = 5.8 \times 109$ ).

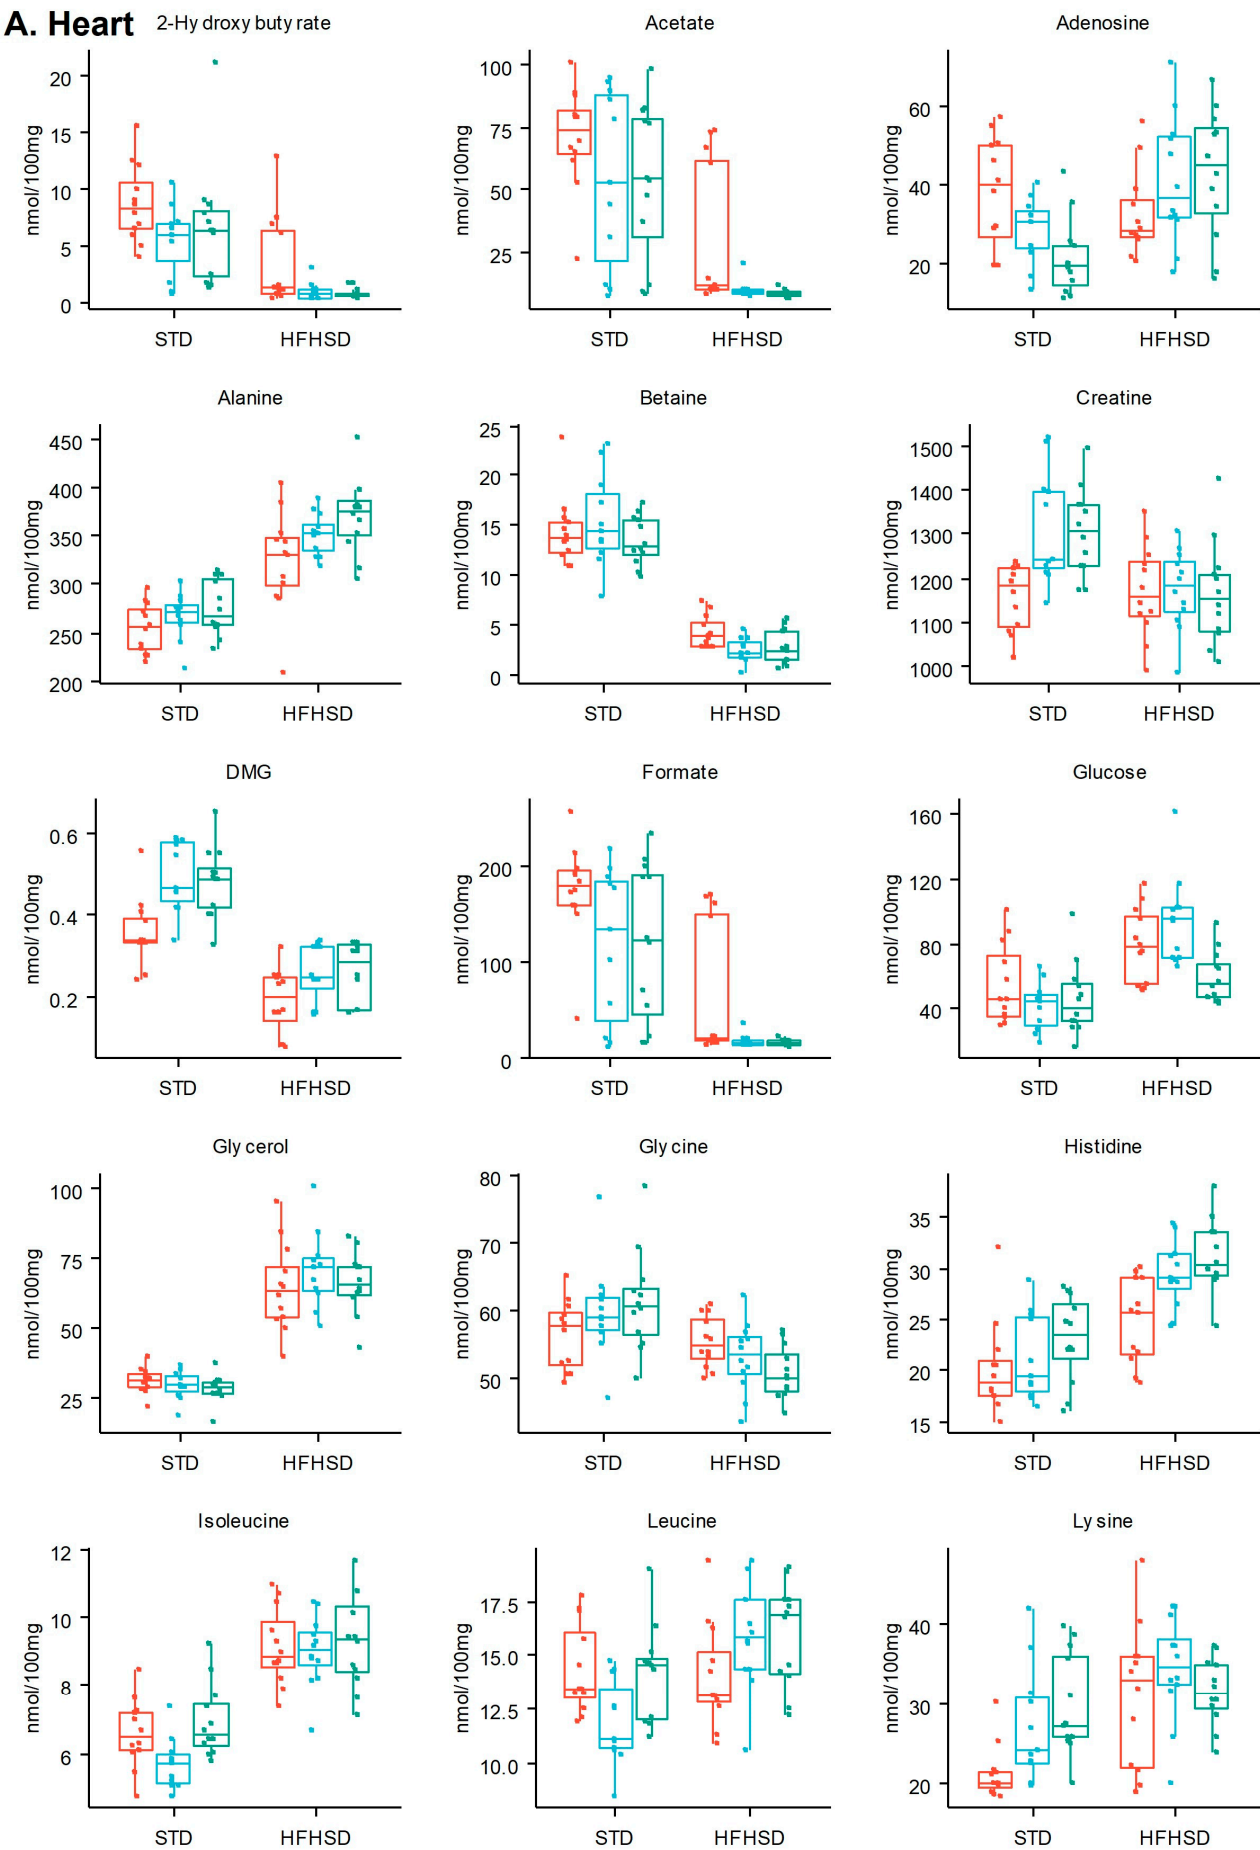



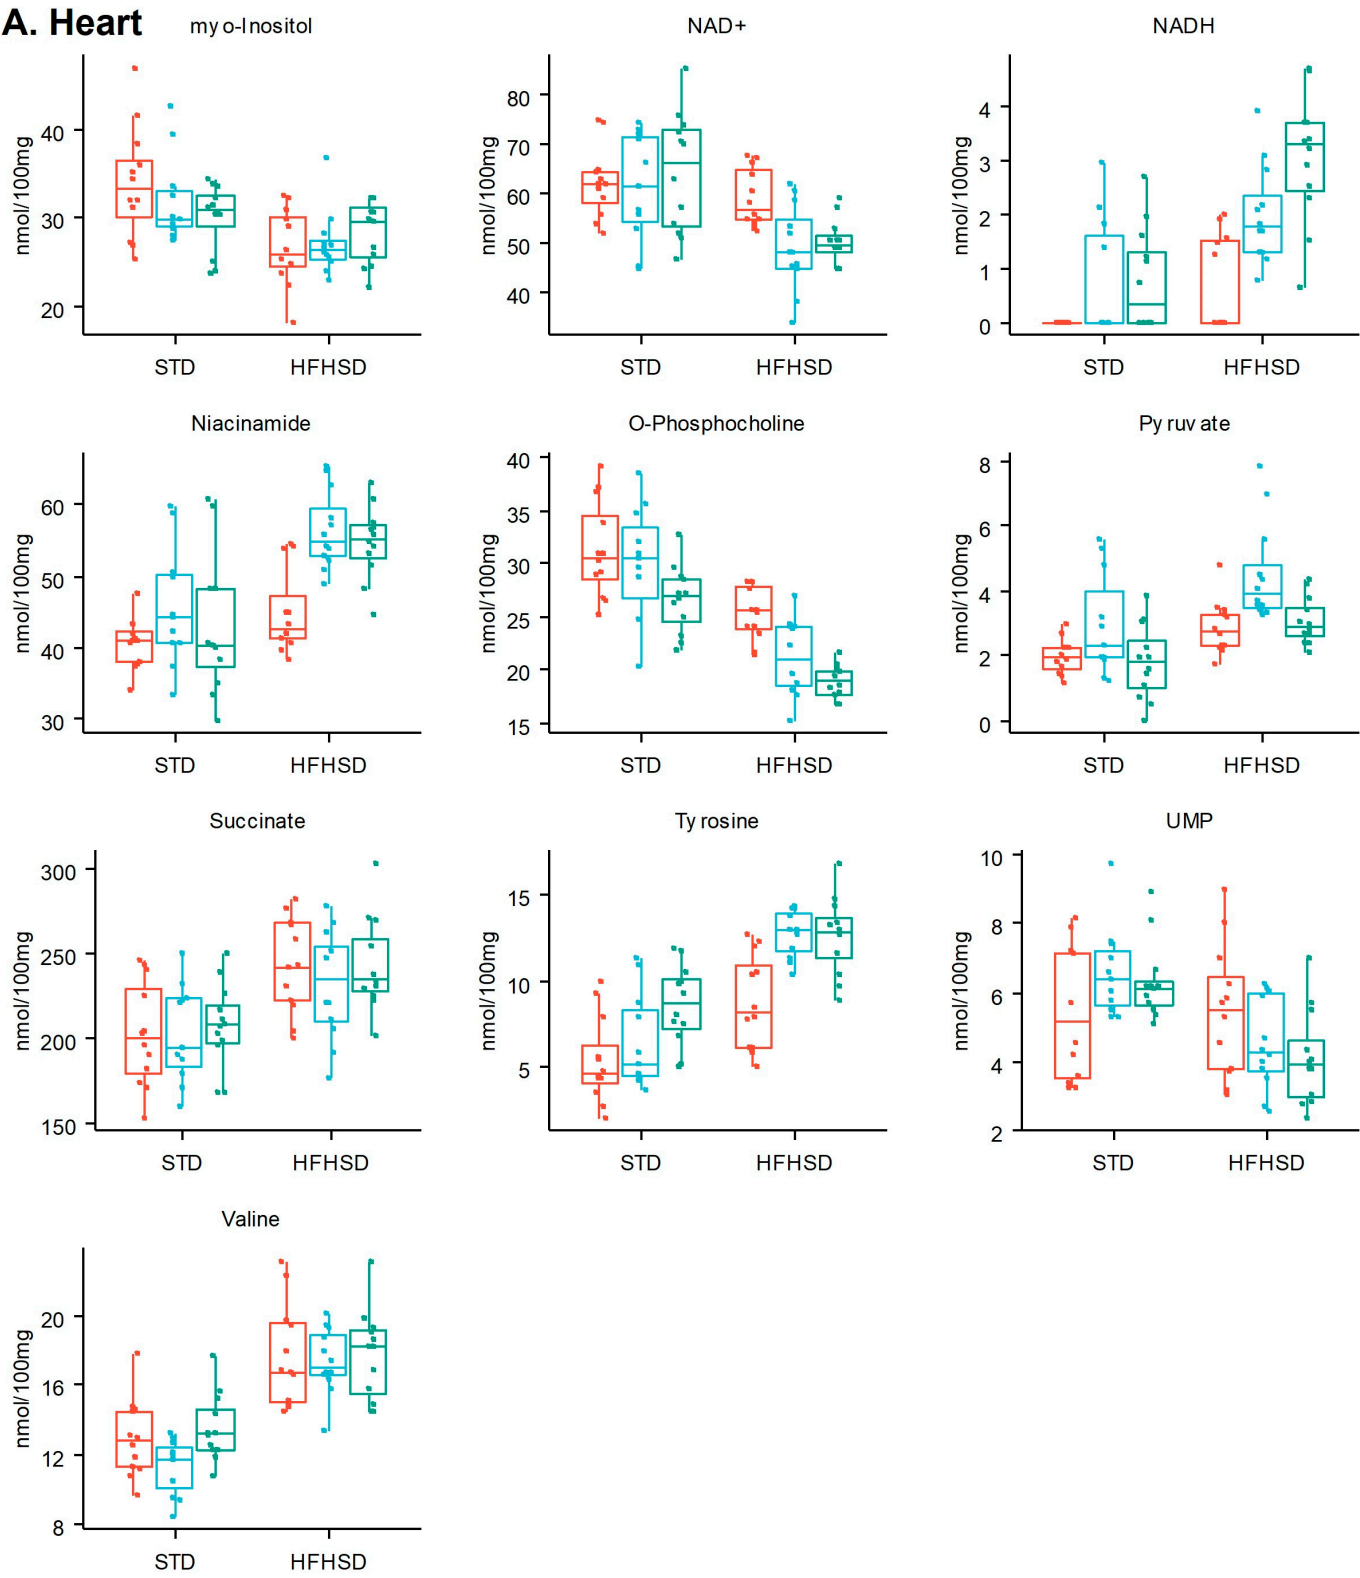

**B. Liver** 2-Hy droxy buty rate

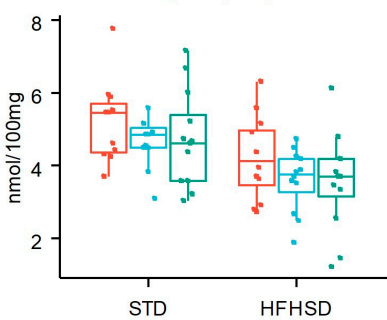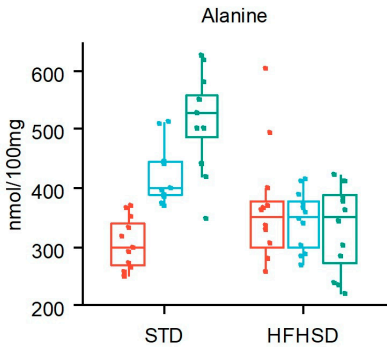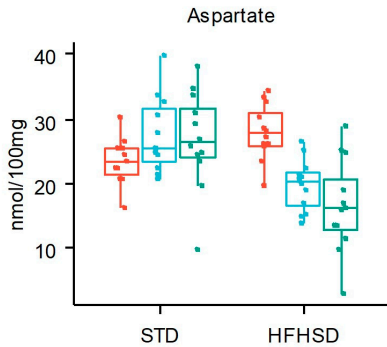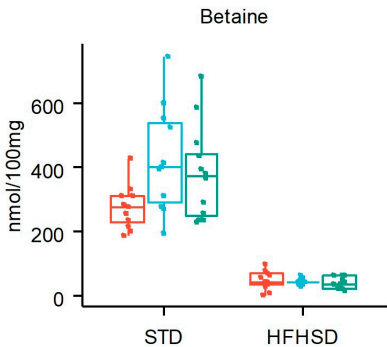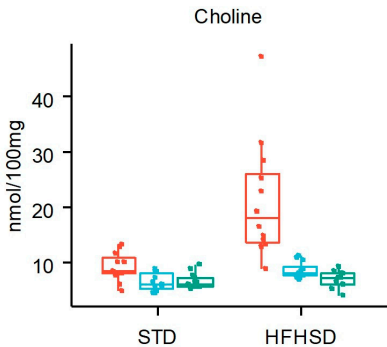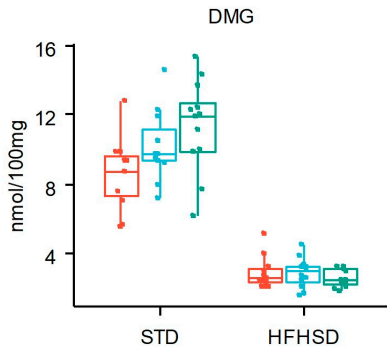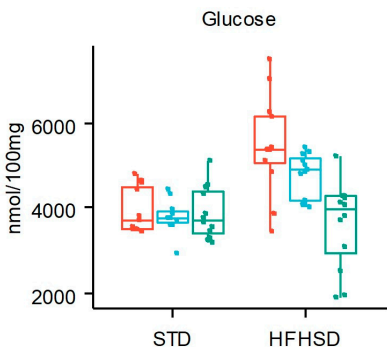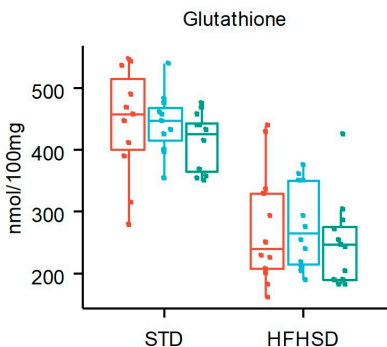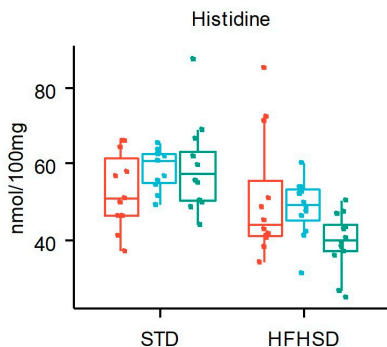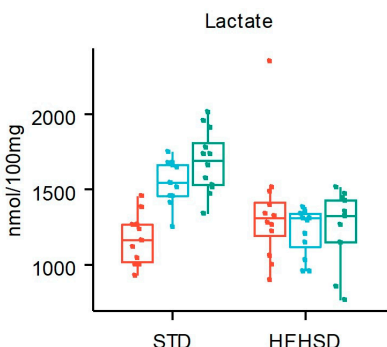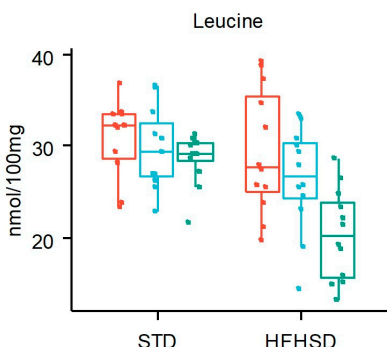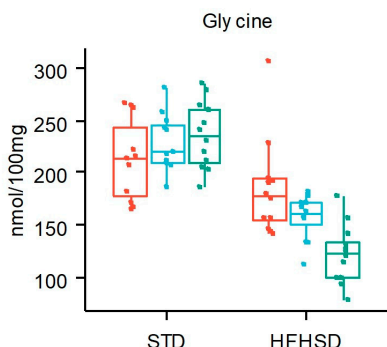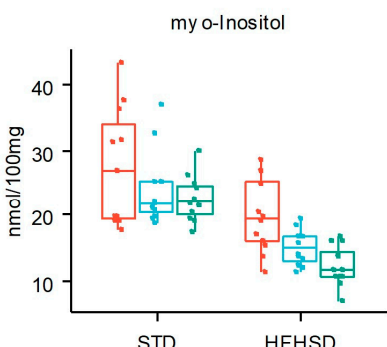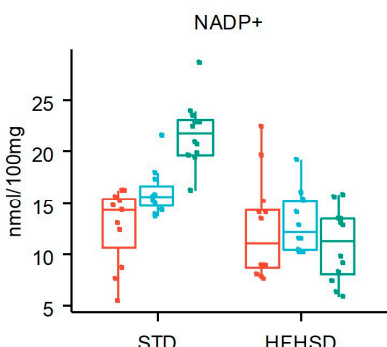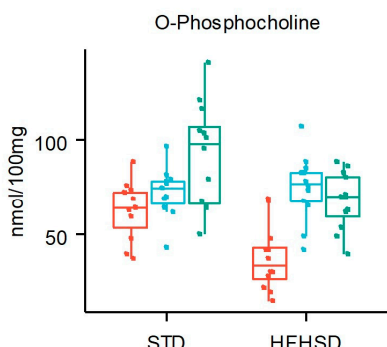

**B. Liver**    Phenylalanine

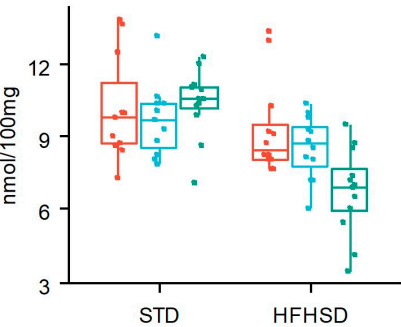

Sarcosine

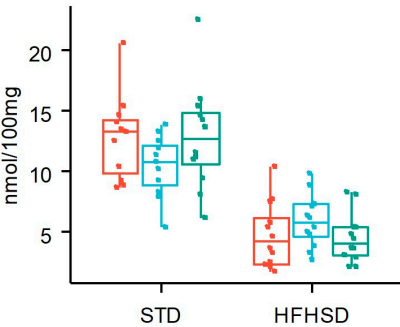

Succinate

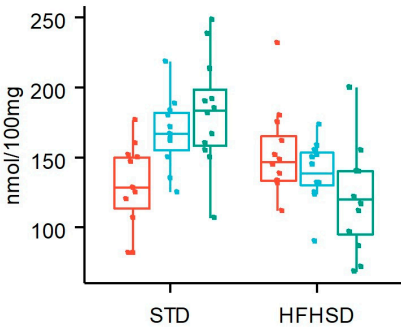

Taurine

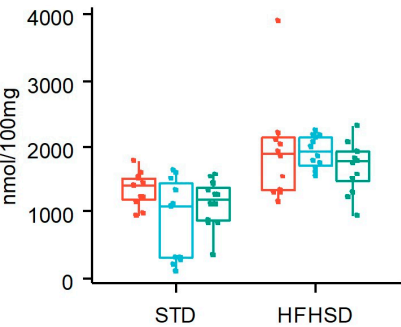

Tyrosine

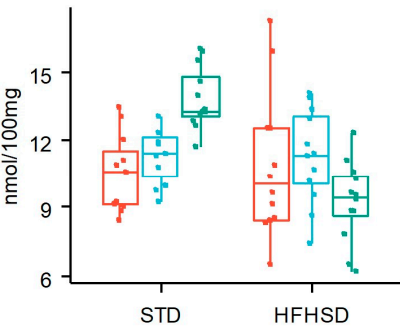

**C. Skeletal Muscle**

Betaine

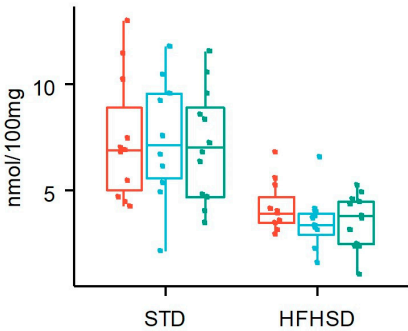

Carnosine

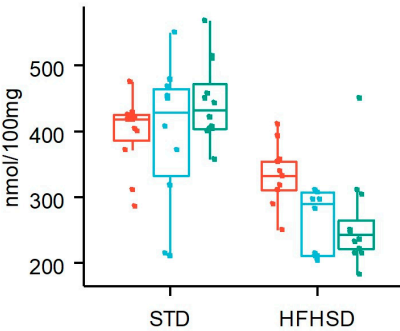

DMG

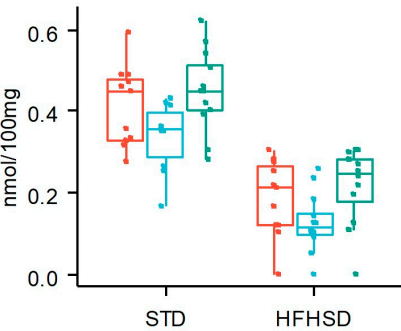

Glycine

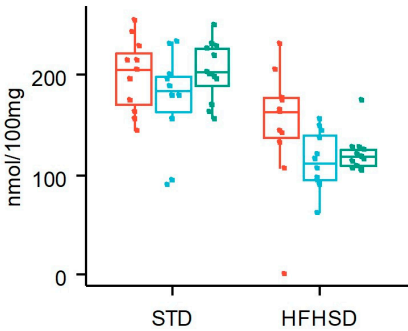

myo-Inositol

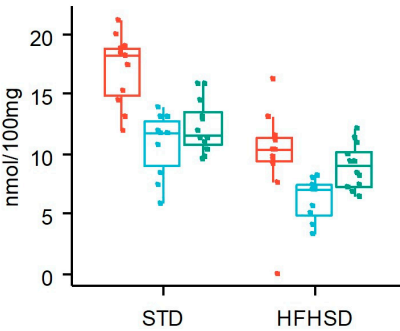

Sarcosine

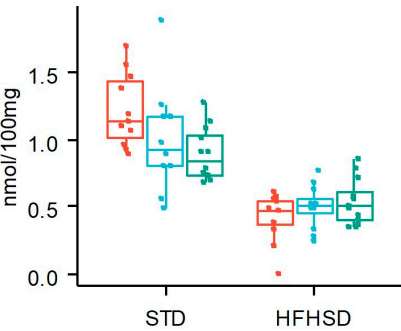

42

43

44

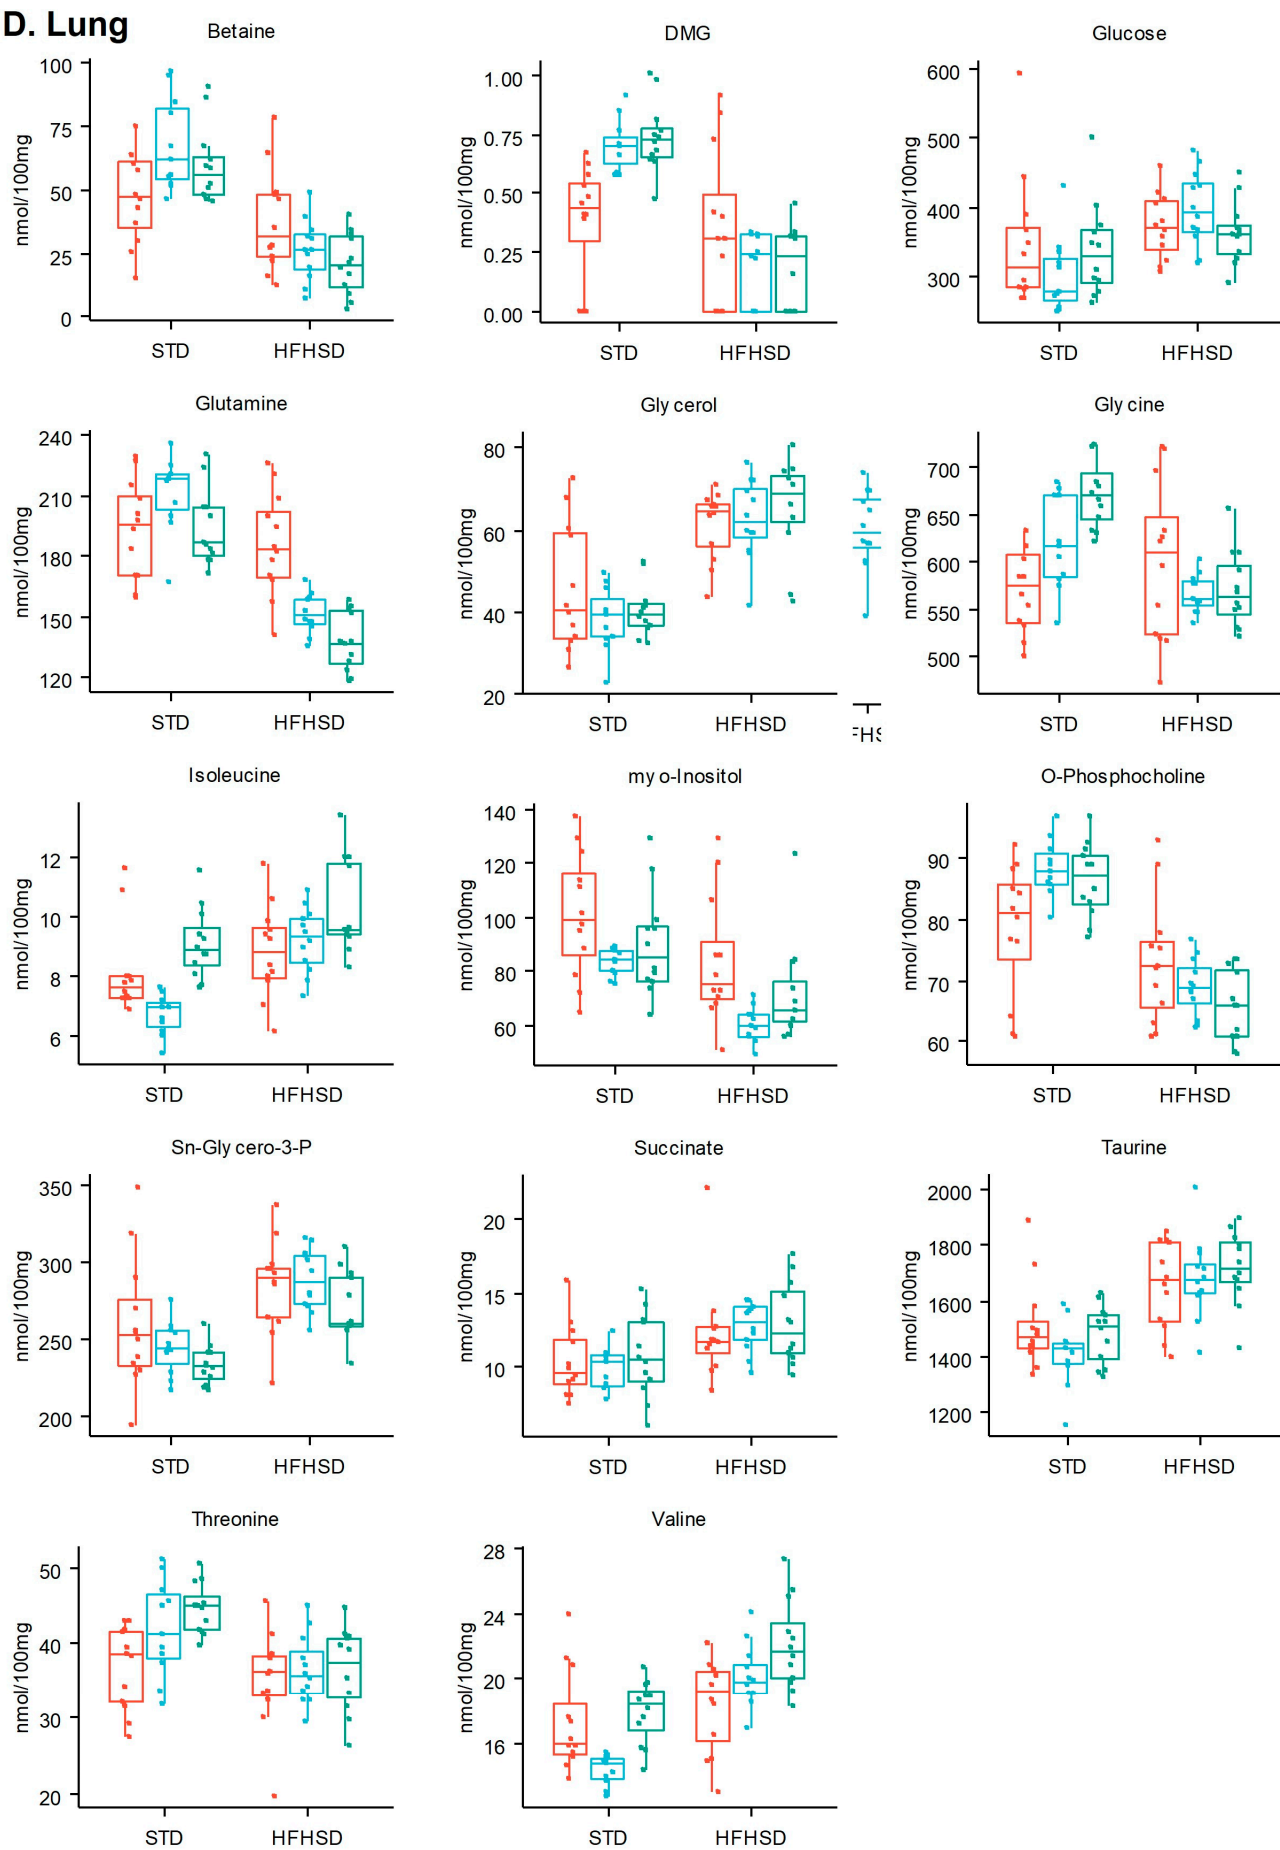

E. Kidney

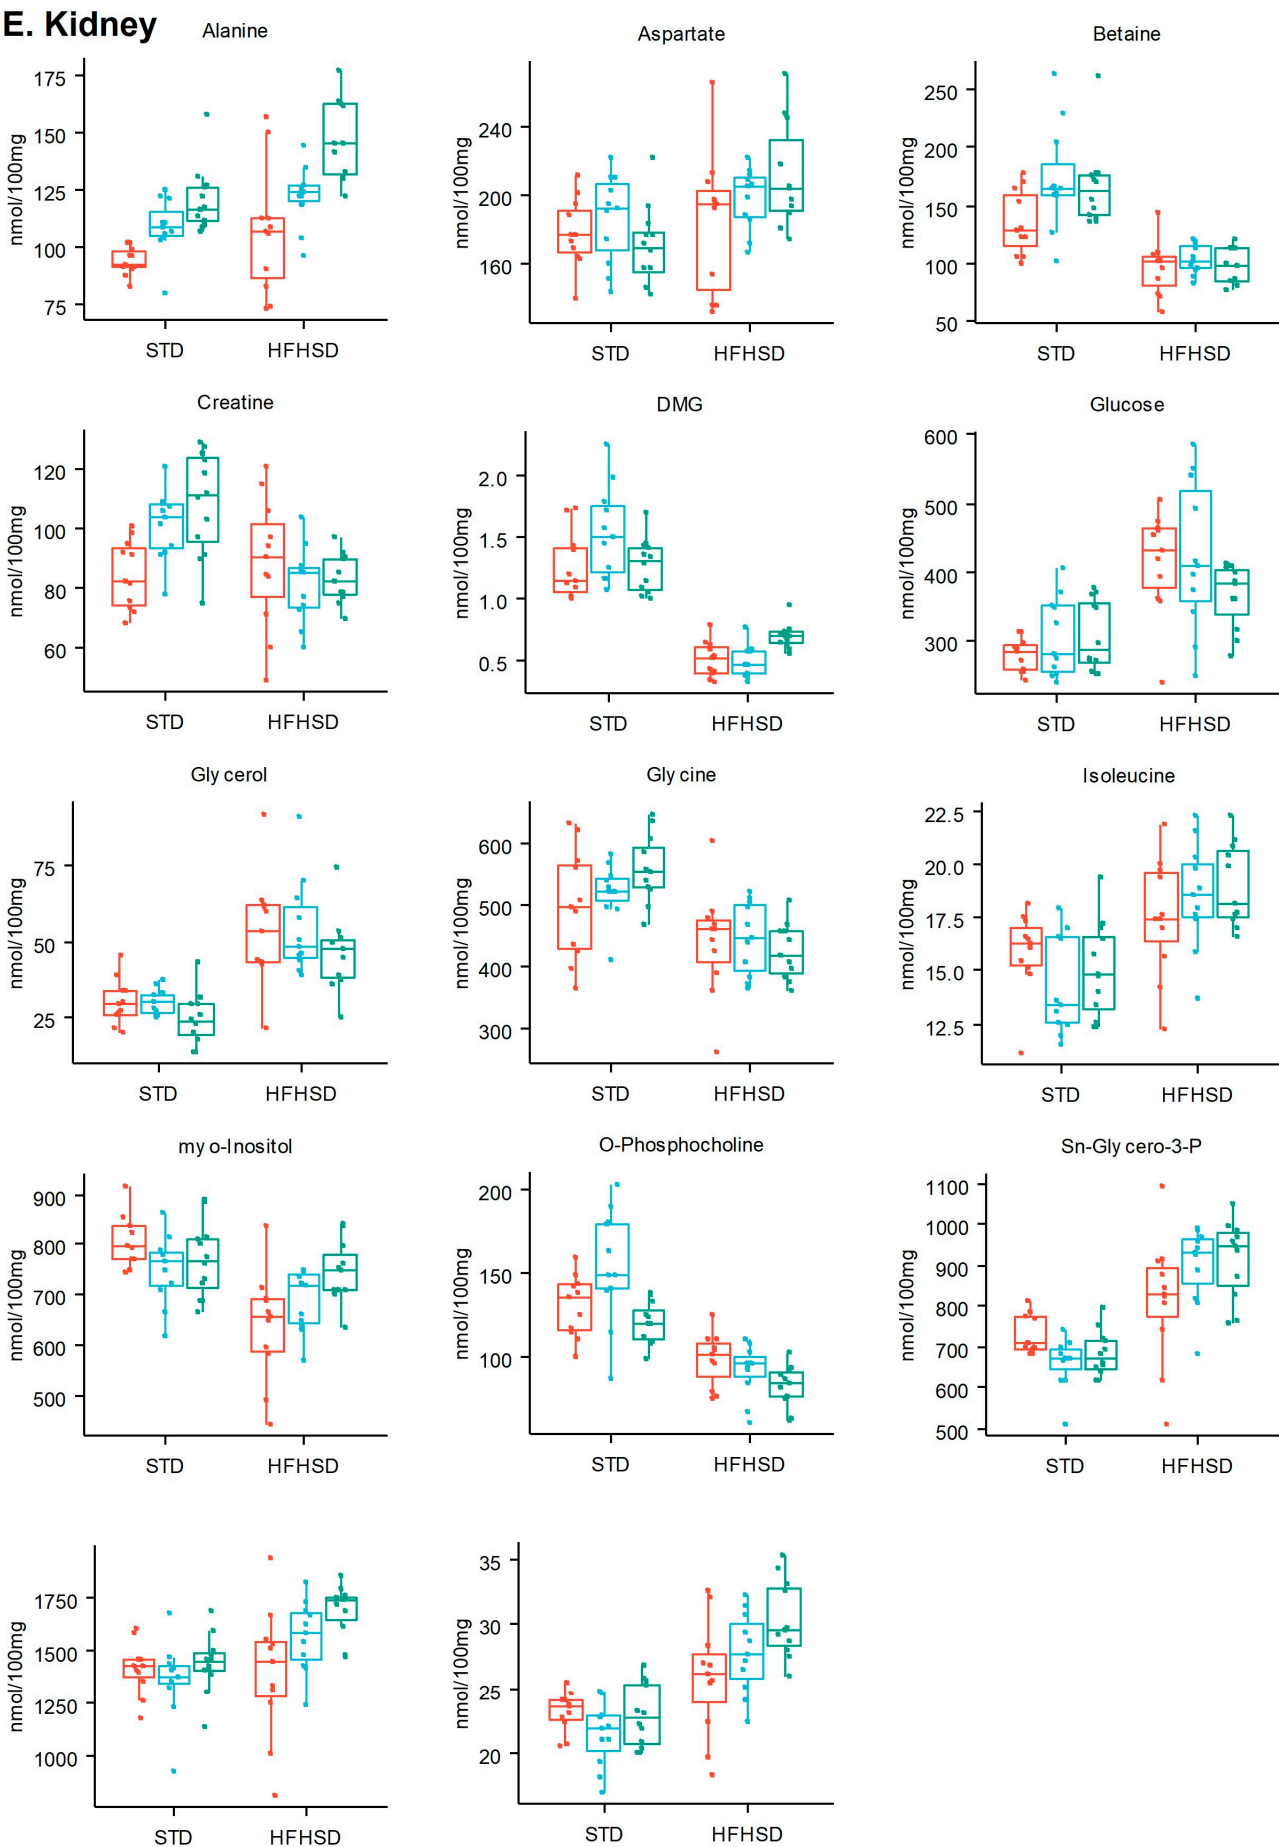



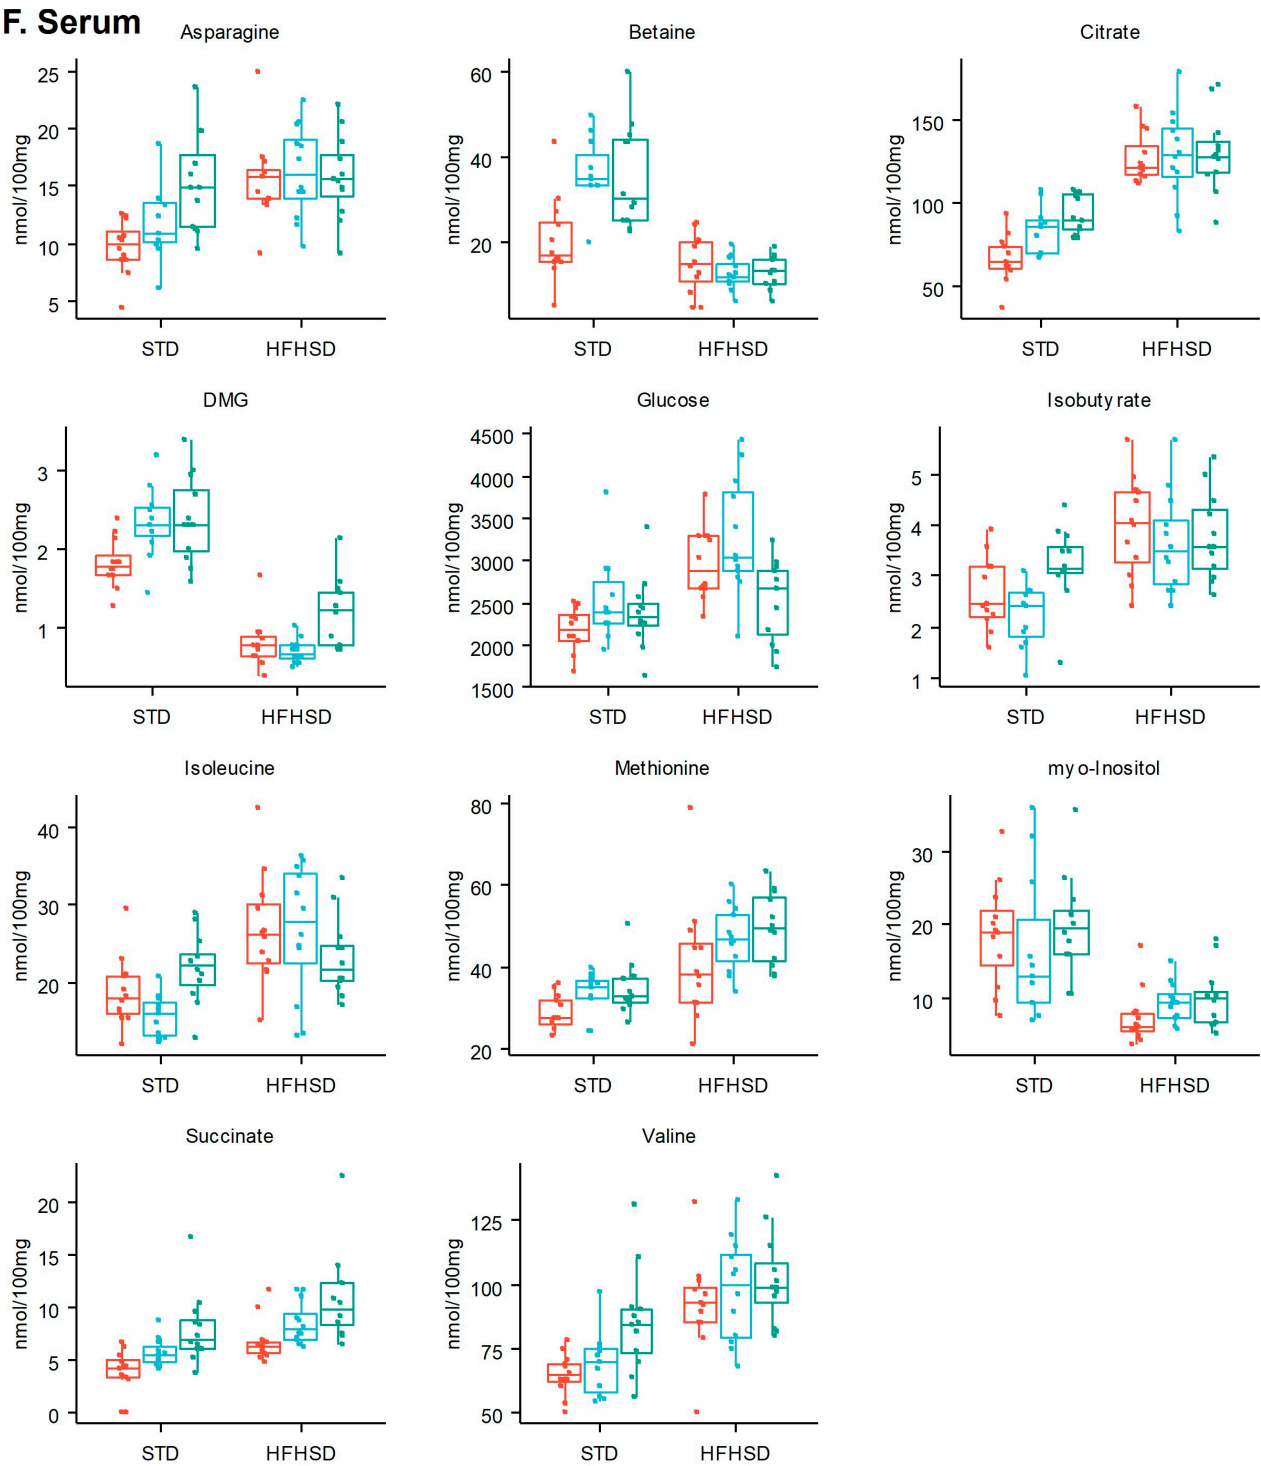

**Supplementary Figure 4.** Metabolite concentrations in nmol/100 mg of organ, depending on the diet (STD and HFHSD) and over time (6, 10 and 14 weeks respectively in red, blue and green). Only metabolites that present a significant impact of diet on ANOVA and t-tests are reported. All measurement points are represented on the box plots. The 3 horizontal bars represent the median, the first and the third quartile. The brain does not have any significant metabolites impacted by the diet. The metabolites impacted by the diet are reported in (A) for the heart, (B) kidney, (C) liver, (D) lung, (E) muscle, and (F) serum. The associated statistics are available in Table 1.
